# Supplementary material
Source: PubMed Central journal article supplement (PMC2556607)
Supplement: blood-2007-09-111658_1.pdf [file blood-2007-09-111658_1.pdf]

| Gene/SNP       | Levels | N <sup>‡</sup> | % Dead | HR <sup>†</sup> | 95% CI           | Gene/SNP       | Levels | N <sup>‡</sup> | % Dead | HR <sup>†</sup> | 95% CI           |
|----------------|--------|----------------|--------|-----------------|------------------|----------------|--------|----------------|--------|-----------------|------------------|
| <b>CARD15*</b> | CC     | 115            | 20.9%  | 1.00            | reference        | <b>CARD15*</b> | CC     | 196            | 23.5%  | 1.00            | reference        |
| rs2066842      | CT     | 69             | 26.1%  | 1.33            | 0.71-2.46        | rs2066844      | CT     | 19             | 21.1%  | 1.11            | 0.38-3.18        |
| P268S          | TT     | 14             | 28.6%  | 1.40            | 0.47-4.13        | R702W          | TT     | 0              | 0.0%   |                 |                  |
| Ex4+156C→T     | Total  | 198            |        |                 | p=0.35           | Ex4-359C→T     | Total  | 215            |        |                 | p=0.84           |
|                | CT/TT  | 83             | 26.5%  | 1.34            | 0.74-2.41        |                | CT/TT  | 19             | 21.1%  | 1.11            | 0.38-3.18        |
| <b>CARD15</b>  | --     | 335            | 26.0%  | 1.00            | reference        | <b>CCR2</b>    | GG     | 283            | 26.5%  | 1.00            | reference        |
| rs2066847      | +-     | 22             | 27.3%  | 1.14            | 0.49-2.64        | rs1799864      | AG     | 59             | 23.7%  | 1.01            | 0.56-1.78        |
| Ex11-35→C      | ++     | 0              | 0.0%   |                 | -                | V64I           | AA     | 4              | 0.0%   | 0.00            | 0 -              |
|                | Total  | 357            |        |                 | p=0.76           | Ex2+241G→A     | Total  | 346            |        |                 | p=0.44           |
|                | +/-++  | 22             | 27.3%  | 1.14            | 0.49-2.64        |                | AG/AA  | 63             | 22.2%  | 0.89            | 0.50-1.57        |
| <b>CCR5</b>    | ++     | 282            | 25.5%  | 1.00            | reference        | <b>CTLA4</b>   | AA     | 117            | 22.2%  | 1.00            | reference        |
| rs333          | +-     | 60             | 26.7%  | 1.03            | 0.59-1.76        | rs231775       | AG     | 154            | 27.3%  | 1.22            | 0.74-1.99        |
| Δ32            | --     | 3              | 0.0%   | 0.00            | -                | T17A           | GG     | 63             | 30.2%  | 1.33            | 0.73-2.42        |
|                | Total  | 345            |        |                 | p=0.82           | Ex1-61A→G      | Total  | 334            |        |                 | p=0.32           |
|                | +/-    | 63             | 25.4%  | 0.98            | 0.57-1.69        |                | AG/GG  | 217            | 28.1%  | 1.25            | 0.79-1.98        |
| <b>CSF3*</b>   | GG     | 74             | 21.6%  | <b>1.00</b>     | <b>reference</b> | <b>CX3CR1*</b> | GG     | 115            | 21.7%  | 1.00            | reference        |
| rs25645        | AG     | 94             | 16.0%  | <b>0.68</b>     | <b>0.33-1.38</b> | rs3732379      | AG     | 77             | 26.0%  | 1.19            | 0.65-2.17        |
| L185L          | AA     | 29             | 48.3%  | <b>2.65</b>     | <b>1.27-5.49</b> | V249I          | AA     | 17             | 23.5%  | 1.11            | 0.38-3.19        |
| Ex4+96G→A      | Total  | 197            |        |                 | <b>p=0.041</b>   | Ex2+754G→A     | Total  | 209            |        |                 | p=0.65           |
|                | AG/AA  | 123            | 23.6%  | <b>1.06</b>     | <b>0.57-1.96</b> |                | AG/AA  | 94             | 25.5%  | 1.18            | 0.66-2.08        |
| <b>CXCL12</b>  | GG     | 228            | 28.5%  | <b>1.00</b>     | <b>reference</b> | <b>FCGR2A</b>  | GG     | 83             | 22.9%  | 1.00            | reference        |
| rs1801157      | AG     | 114            | 19.3%  | <b>0.63</b>     | <b>0.38-1.02</b> | rs1801274      | AG     | 165            | 27.9%  | 1.47            | 0.85-2.50        |
| 3'UTR          | AA     | 10             | 30.0%  | <b>0.73</b>     | <b>0.22-2.34</b> | H165R          | AA     | 102            | 24.5%  | 1.15            | 0.63-2.08        |
|                | Total  | 352            |        |                 | <b>p=0.090</b>   | Ex4-120A→G     | Total  | 350            |        |                 | p=0.72           |
|                | AG/AA  | 124            | 20.2%  | <b>0.64</b>     | <b>0.39-1.02</b> |                | AG/AA  | 267            | 26.6%  | 1.33            | 0.80-2.21        |
| <b>ICAM1</b>   | AA     | 339            | 25.1%  | <b>1.00</b>     | <b>reference</b> |                |        |                |        |                 |                  |
| rs5491         | AT     | 8              | 50.0%  | <b>2.95</b>     | <b>1.06-8.16</b> |                |        |                |        |                 |                  |
| K56M           | TT     | 0              | 0.0%   |                 | -                |                |        |                |        |                 |                  |
| Ex2+100A→T     | Total  | 347            |        |                 | <b>p=0.037</b>   |                |        |                |        |                 |                  |
|                | AT/TT  | 8              | 50.0%  | <b>2.95</b>     | <b>1.06-8.16</b> |                |        |                |        |                 |                  |
| <b>IFNA1*</b>  | TT     | 163            | 25.8%  | 1.00            | reference        | <b>IFNG</b>    | AA     | 176            | 24.4%  | 1.00            | reference        |
| rs1758566      | CT     | 34             | 14.7%  | 0.60            | 0.23-1.53        | rs1861494      | AG     | 133            | 28.6%  | 1.00            | 0.64-1.54        |
| 5'UTR          | CC     | 1              | 0.0%   | 0.00            | -                | IVS3+284G→A    | GG     | 34             | 26.5%  | 1.03            | 0.50-2.11        |
| Ex1+51T→C      | Total  | 198            |        |                 | p=0.2            |                | Total  | 343            |        |                 | p=0.96           |
|                | CT/CC  | 35             | 14.3%  | 0.58            | 0.22-1.47        |                | AG/GG  | 167            | 28.1%  | 1.00            | 0.66-1.52        |
| <b>IFNG</b>    | TT     | 142            | 25.4%  | 1.00            | reference        | <b>IFNGR1*</b> | AA     | 160            | 21.3%  | 1.00            | reference        |
| rs2069705      | CT     | 150            | 29.3%  | 0.97            | 0.61-1.51        | rs3799488      | AG     | 51             | 29.4%  | 1.40            | 0.75-2.57        |
| C-1615T        | CC     | 50             | 20.0%  | 0.64            | 0.31-1.29        | IVS6-4G→A      | GG     | 4              | 25.0%  | 0.59            | 0.07-4.35        |
|                | Total  | 342            |        |                 | p=0.29           |                | Total  | 215            |        |                 | p=0.64           |
|                | CT/CC  | 200            | 27.0%  | 0.88            | 0.57-1.36        |                | AG/GG  | 55             | 29.1%  | 1.29            | 0.70-2.34        |
| <b>IFNGR2</b>  | AA     | 269            | 23.8%  | 1.00            | reference        | <b>IL1A</b>    | GG     | 189            | 21.2%  | <b>1.00</b>     | <b>reference</b> |
| rs9808753      | AG     | 79             | 31.6%  | 1.42            | 0.89-2.25        | rs17561        | GT     | 147            | 31.3%  | <b>1.62</b>     | <b>1.05-2.49</b> |
| Q64R           | GG     | 6              | 33.3%  | 1.12            | 0.27-4.60        | A114S          | TT     | 18             | 27.8%  | <b>1.63</b>     | <b>0.64-4.16</b> |
| Ex2-16A→G      | Total  | 354            |        |                 | p=0.20           | Ex5+21G→T      | Total  | 354            |        |                 | <b>p=0.033</b>   |
|                | AG/GG  | 85             | 31.8%  | 1.39            | 0.88-2.18        |                | GT/TT  | 165            | 30.9%  | <b>1.62</b>     | <b>1.06-2.47</b> |
| <b>IL1A</b>    | CC     | 183            | 20.8%  | <b>1.00</b>     | <b>reference</b> | <b>IL1B</b>    | CC     | 148            | 25.0%  | 1.00            | reference        |
| rs1800587      | CT     | 157            | 31.8%  | <b>1.82</b>     | <b>1.18-2.79</b> | rs16944        | CT     | 156            | 27.6%  | 0.98            | 0.63-1.53        |
| C-889T         | TT     | 20             | 35.0%  | <b>2.09</b>     | <b>0.92-4.68</b> | TT             | 50     | 28.0%          | 1.09   | 0.58-2.02       |                  |
| Ex1+12C→T      | Total  | 360            |        |                 | <b>p=0.0041</b>  | C-511T         | Total  | 354            |        |                 | p=0.85           |
|                | CT/TT  | 177            | 32.2%  | <b>1.85</b>     | <b>1.22-2.80</b> |                | CT/TT  | 206            | 27.7%  | 1.01            | 0.66-1.52        |

|                                                     |       |     |       |             |                  |                                                   |       |     |        |              |                   |
|-----------------------------------------------------|-------|-----|-------|-------------|------------------|---------------------------------------------------|-------|-----|--------|--------------|-------------------|
| <b>IL1B</b><br>rs1143627<br>C-31T                   | TT    | 148 | 25.0% | 1.00        | reference        | <b>IL1B</b><br>rs1143634<br>C3954T<br>F105F       | CC    | 237 | 24.1%  | 1.00         | reference         |
|                                                     | CT    | 156 | 26.3% | 0.94        | 0.60-1.47        |                                                   | CT    | 107 | 28.0%  | 1.22         | 0.78-1.90         |
|                                                     | CC    | 56  | 28.6% | 1.10        | 0.60-1.98        |                                                   | TT    | 14  | 42.9%  | 2.29         | 0.97-5.35         |
|                                                     | Total | 360 |       |             | p=0.86           |                                                   | Total | 358 |        |              | p=0.087           |
|                                                     | CT/CC | 212 | 26.9% | 0.98        | 0.64-1.49        |                                                   | CT/TT | 121 | 29.8%  | 1.32         | 0.86-2.01         |
| <b>IL1RN</b><br>rs454078<br>IVS6+59A→T<br>aka A9589 | AA    | 196 | 24.0% | 1.00        | reference        | <b>IL2</b><br>rs2069762<br>-384 T→G               | TT    | 181 | 29.8%  | 1.00         | reference         |
|                                                     | AT    | 126 | 30.2% | 1.18        | 0.76-1.81        |                                                   | GT    | 150 | 22.0%  | 0.78         | 0.50-1.19         |
|                                                     | TT    | 31  | 22.6% | 0.86        | 0.38-1.90        |                                                   | GG    | 28  | 28.6%  | 0.92         | 0.43-1.94         |
|                                                     | Total | 353 |       |             | p=0.90           |                                                   | Total | 359 |        |              | p=0.4             |
|                                                     | AT/TT | 157 | 28.7% | 1.11        | 0.73-1.67        |                                                   | GT/GG | 178 | 23.0%  | 0.80         | 0.53-1.20         |
| <b>IL3*</b><br>rs40401<br>Ex1-84C→T<br>P27S         | CC    | 106 | 25.5% | 1.00        | reference        | <b>IL4</b><br>rs2070874<br>5'UTR<br>Ex1-168C→T    | CC    | 245 | 25.7%  | 1.00         | reference         |
|                                                     | CT    | 76  | 18.4% | 0.69        | 0.36-1.32        |                                                   | CT    | 93  | 27.7%  | 1.28         | 0.80-2.04         |
|                                                     | TT    | 18  | 27.8% | 1.53        | 0.57-4.11        |                                                   | TT    | 18  | 25.0%  | 1.03         | 0.46-2.30         |
|                                                     | Total | 200 |       |             | p=0.91           |                                                   | Total | 356 |        |              | p=0.47            |
|                                                     | CT/TT | 94  | 20.2% | 0.80        | 0.44-1.44        |                                                   | CT/TT | 111 | 27.0%  | 1.22         | 0.79-1.88         |
| <b>IL4</b><br>rs2243248<br>T-1098G                  | TT    | 303 | 26.4% | 1.00        | reference        | <b>IL4</b><br>rs2243250<br>C-524T                 | CC    | 230 | 26.9%  | 1.00         | reference         |
|                                                     | GT    | 52  | 23.1% | 0.78        | 0.42-1.43        |                                                   | CT    | 94  | 25.8%  | 1.15         | 0.72-1.85         |
|                                                     | GG    | 4   | 25.0% | 1.60        | 0.21-11.6        |                                                   | TT    | 28  | 11.1%  | 0.34         | 0.08-1.40         |
|                                                     | Total | 359 |       |             | p=0.58           |                                                   | Total | 352 |        |              | p=0.47            |
|                                                     | GT/GG | 56  | 23.2% | 0.81        | 0.45-1.46        |                                                   | CT/TT | 122 | 23.4%  | 0.98         | 0.61-1.55         |
| <b>IL4R</b><br>rs2107356<br>C-29429T                | CC    | 122 | 27.0% | 1.00        | reference        | <b>IL5</b><br>rs2069807<br>C-1551T                | CC    | 337 | 24.3%  | <b>1.00</b>  | <b>reference</b>  |
|                                                     | CT    | 168 | 28.0% | 1.00        | 0.63-1.56        |                                                   | CT    | 8   | 50.0%  | <b>3.46</b>  | <b>1.25-9.50</b>  |
|                                                     | TT    | 62  | 16.1% | 0.53        | 0.25-1.07        |                                                   | TT    | 2   | 100.0% | <b>32.30</b> | <b>7.40-140.</b>  |
|                                                     | Total | 352 |       |             | p=0.14           |                                                   | Total | 347 |        |              | <b>p&lt;0.001</b> |
|                                                     | CT/TT | 230 | 24.8% | 0.86        | 0.56-1.32        |                                                   | CT/TT | 10  | 60.0%  | <b>4.86</b>  | <b>2.09-11.2</b>  |
| <b>IL5</b><br>rs2069812<br>C-745T                   | CC    | 145 | 24.1% | 1.00        | reference        | <b>IL5*</b><br>rs2069818<br>C-1551T               | CC    | 198 | 22.2%  | 1.00         | reference         |
|                                                     | CT    | 149 | 27.5% | 1.14        | 0.72-1.78        |                                                   | AC    | 2   | 50.0%  | 1.75         | 0.23-12.7         |
|                                                     | TT    | 56  | 25.0% | 1.23        | 0.65-2.30        |                                                   | AA    | 0   | 0.0%   |              |                   |
|                                                     | Total | 350 |       |             | p=0.47           |                                                   | Total | 200 |        |              | p=0.58            |
|                                                     | CT/TT | 205 | 26.8% | 1.16        | 0.75-1.77        |                                                   | AC/AA | 2   | 50.0%  | 1.75         | 0.23-12.7         |
| <b>IL6</b><br>rs1800795<br>G-174C                   | GG    | 142 | 31.7% | <b>1.00</b> | <b>reference</b> | <b>IL6</b><br>rs1800797<br>G-597A                 | GG    | 145 | 32.4%  | <b>1.00</b>  | <b>reference</b>  |
|                                                     | CG    | 168 | 23.8% | <b>0.73</b> | <b>0.47-1.11</b> |                                                   | AG    | 164 | 22.6%  | <b>0.70</b>  | <b>0.45-1.08</b>  |
|                                                     | CC    | 50  | 18.0% | <b>0.50</b> | <b>0.24-1.02</b> |                                                   | AA    | 48  | 18.8%  | <b>0.53</b>  | <b>0.26-1.09</b>  |
|                                                     | Total | 360 |       |             | <b>p=0.033</b>   |                                                   | Total | 357 |        |              | <b>p=0.039</b>    |
|                                                     | CG/CC | 218 | 22.5% | <b>0.67</b> | <b>0.44-1.00</b> |                                                   | AG/AA | 212 | 21.7%  | <b>0.66</b>  | <b>0.43-0.99</b>  |
| <b>IL7R*</b><br>rs1494555<br>V138I<br>Ex4+33G→A     | AA    | 93  | 21.5% | 1.00        | reference        | <b>IL8</b><br>rs4073<br>A-351T<br>aka -251        | TT    | 92  | 25.0%  | 1.00         | reference         |
|                                                     | AG    | 96  | 27.1% | 1.33        | 0.73-2.40        |                                                   | AT    | 168 | 25.6%  | 0.89         | 0.53-1.47         |
|                                                     | GG    | 24  | 12.5% | 0.53        | 0.15-1.79        |                                                   | AA    | 81  | 29.6%  | 1.23         | 0.68-2.20         |
|                                                     | Total | 213 |       |             | p=0.75           |                                                   | Total | 341 |        |              | p=0.50            |
|                                                     | AG/GG | 120 | 24.2% | 1.15        | 0.64-2.06        |                                                   | AT/AA | 249 | 26.9%  | 0.98         | 0.61-1.58         |
| <b>IL8</b><br>rs2227306<br>C+781T                   | CC    | 123 | 27.1% | 1.00        | reference        | <b>IL8</b><br>rs2227307<br>G+396T                 | TT    | 96  | 27.6%  | 1.00         | reference         |
|                                                     | CT    | 157 | 26.2% | 0.82        | 0.50-1.33        |                                                   | GT    | 172 | 25.5%  | 0.79         | 0.50-1.25         |
|                                                     | TT    | 59  | 25.7% | 0.96        | 0.52-1.77        |                                                   | GG    | 70  | 25.4%  | 0.94         | 0.50-1.74         |
|                                                     | Total | 339 |       |             | p=0.81           |                                                   | Total | 338 |        |              | p=0.64            |
|                                                     | CT/TT | 216 | 26.0% | 0.85        | 0.53-1.35        |                                                   | GT/GG | 242 | 25.5%  | 0.83         | 0.53-1.27         |
| <b>IL8RB</b><br>rs1126579<br>Ex3+1235T→C            | CC    | 98  | 25.5% | 1.00        | reference        | <b>IL8RB</b><br>rs1126580<br>3'UTR<br>Ex3+1010G→A | AA    | 105 | 18.1%  | <b>1.00</b>  | <b>reference</b>  |
|                                                     | CT    | 186 | 28.5% | 1.10        | 0.68-1.77        |                                                   | AG    | 168 | 28.0%  | <b>2.00</b>  | <b>1.17-3.42</b>  |
|                                                     | TT    | 60  | 16.7% | 0.70        | 0.33-1.46        |                                                   | GG    | 61  | 32.8%  | <b>2.56</b>  | <b>1.35-4.83</b>  |
|                                                     | Total | 344 |       |             | p=0.54           |                                                   | Total | 334 |        |              | <b>p=0.0022</b>   |
|                                                     | CT/TT | 246 | 25.6% | 1.01        | 0.63-1.60        |                                                   | AG/GG | 229 | 29.3%  | <b>2.14</b>  | <b>1.28-3.57</b>  |
| <b>IL8RB*</b><br>rs2230054<br>L262L<br>Ex3+811C→T   | TT    | 48  | 20.8% | 1.00        | reference        | <b>IL9*</b><br>rs1799962<br>-350A→G               | AA    | 167 | 24.6%  | 1.00         | reference         |
|                                                     | CT    | 116 | 27.6% | 1.47        | 0.72-3.00        |                                                   | AG    | 32  | 18.8%  | 0.79         | 0.33-1.87         |
|                                                     | CC    | 49  | 14.3% | 0.81        | 0.30-2.13        |                                                   | GG    | 1   | 0.0%   | 0.00         |                   |
|                                                     | Total | 213 |       |             | p=0.80           |                                                   | Total | 200 |        |              | p=0.41            |
|                                                     | CT/CC | 165 | 23.6% | 1.28        | 0.63-2.57        |                                                   | AG/GG | 33  | 18.2%  | 0.74         | 0.31-1.73         |

|                                                |       |     |       |             |                  |                                                              |       |     |       |             |                  |
|------------------------------------------------|-------|-----|-------|-------------|------------------|--------------------------------------------------------------|-------|-----|-------|-------------|------------------|
| <b>IL9R*</b><br>rs6522<br>E239Q                | GG    | 202 | 23.3% | 1.00        | reference        | <b>IL10</b><br>rs1800871<br>C-819T                           | CC    | 188 | 23.9% | 1.00        | reference        |
|                                                | CG    | 0   | 0.0%  |             |                  |                                                              | CT    | 145 | 28.3% | 1.18        | 0.77-1.80        |
|                                                | CC    | 0   | 0.0%  |             |                  |                                                              | TT    | 21  | 28.6% | 1.14        | 0.47-2.71        |
|                                                | Total | 202 |       |             | p=0.41           |                                                              | Total | 354 |       |             | p=0.50           |
|                                                | CG/CC | 0   | 0.0%  |             |                  |                                                              | CT/TT | 166 | 28.3% | 1.17        | 0.77-1.77        |
| <b>IL10</b><br>rs1800872<br>C-592A             | CC    | 187 | 22.5% | 1.00        | reference        | <b>IL10</b><br>rs1800890<br>T-3575A                          | TT    | 135 | 23.7% | 1.00        | reference        |
|                                                | AC    | 144 | 28.5% | 1.27        | 0.82-1.95        |                                                              | AT    | 170 | 27.1% | 1.15        | 0.73-1.81        |
|                                                | AA    | 21  | 28.6% | 1.23        | 0.51-2.94        |                                                              | AA    | 54  | 31.5% | 1.17        | 0.64-2.14        |
|                                                | Total | 352 |       |             | p=0.32           |                                                              | Total | 359 |       |             | p=0.54           |
|                                                | AC/AA | 165 | 28.5% | 1.27        | 0.83-1.92        |                                                              | AT/AA | 224 | 28.1% | 1.16        | 0.75-1.77        |
| <b>IL10</b><br>rs1800896<br>A-1082G            | AA    | 104 | 20.2% | <b>1.00</b> | <b>reference</b> | <b>IL10RA</b><br>rs9610<br>3'UTR<br>Ex7-109G→A               | GG    | 99  | 33.3% | <b>1.00</b> | <b>reference</b> |
|                                                | AG    | 186 | 26.3% | <b>1.38</b> | <b>0.82-2.30</b> |                                                              | AG    | 167 | 21.0% | <b>0.45</b> | <b>0.27-0.73</b> |
|                                                | GG    | 69  | 36.2% | <b>1.69</b> | <b>0.93-3.04</b> |                                                              | AA    | 90  | 26.7% | <b>0.73</b> | <b>0.42-1.22</b> |
|                                                | Total | 359 |       |             | <b>p=0.079</b>   |                                                              | Total | 356 |       |             | <b>p=0.17</b>    |
|                                                | AG/GG | 255 | 29.0% | <b>1.47</b> | <b>0.90-2.38</b> |                                                              | AG/AA | 257 | 23.0% | <b>0.54</b> | <b>0.34-0.82</b> |
| <b>IL12A</b><br>rs568408<br>G8685A             | GG    | 272 | 26.1% | 1.00        | reference        | <b>IL12B</b><br>rs3212227<br>3'UTR<br>Ex8+159A→C<br>aka 1188 | AA    | 199 | 27.1% | 1.00        | reference        |
|                                                | AG    | 77  | 27.3% | 1.14        | 0.70-1.86        |                                                              | AC    | 129 | 24.0% | 0.87        | 0.55-1.35        |
|                                                | AA    | 9   | 11.1% | 0.51        | 0.07-3.70        |                                                              | CC    | 17  | 23.5% | 0.85        | 0.30-2.34        |
|                                                | Total | 358 |       |             | p=0.94           |                                                              | Total | 345 |       |             | p=0.52           |
|                                                | AG/AA | 86  | 25.6% | 1.08        | 0.66-1.75        |                                                              | AC/CC | 146 | 24.0% | 0.86        | 0.56-1.32        |
| <b>IL13</b><br>rs20541<br>Q144R<br>Ex4+98A→G   | GG    | 210 | 29.0% | 1.00        | reference        | <b>IL13</b><br>rs1800925<br>C-1069T                          | CC    | 208 | 26.0% | 1.00        | reference        |
|                                                | AG    | 123 | 21.1% | 0.70        | 0.43-1.10        |                                                              | CT    | 131 | 25.2% | 0.96        | 0.62-1.49        |
|                                                | AA    | 13  | 23.1% | 0.89        | 0.27-2.87        |                                                              | TT    | 18  | 22.2% | 1.11        | 0.39-3.12        |
|                                                | Total | 346 |       |             | p=0.19           |                                                              | Total | 357 |       |             | p=0.99           |
|                                                | AG/AA | 136 | 21.3% | 0.71        | 0.45-1.10        |                                                              | CT/TT | 149 | 24.8% | 0.98        | 0.63-1.49        |
| <b>IL15</b><br>rs10833<br>3'UTR<br>Ex9-66T→C   | CC    | 161 | 25.5% | 1.00        | reference        | <b>IL15RA</b><br>rs2296135<br>3'UTR<br>Ex8-361A→C            | GG    | 95  | 29.5% | 1.00        | reference        |
|                                                | CT    | 137 | 27.0% | 1.08        | 0.68-1.68        |                                                              | GT    | 179 | 22.3% | 0.85        | 0.51-1.37        |
|                                                | TT    | 45  | 24.4% | 0.88        | 0.45-1.72        |                                                              | TT    | 67  | 31.3% | 1.23        | 0.69-2.17        |
|                                                | Total | 343 |       |             | p=0.87           |                                                              | Total | 341 |       |             | p=0.59           |
|                                                | CT/TT | 182 | 26.4% | 1.02        | 0.67-1.55        |                                                              | GT/TT | 246 | 24.8% | 0.95        | 0.60-1.48        |
| <b>IL16</b><br>rs859<br>3'UTR<br>Ex22+871A→G   | AA    | 188 | 29.3% | 1.00        | reference        | <b>IL16</b><br>rs11325<br>3'UTR<br>Ex22+889G→T               | GG    | 247 | 26.3% | 1.00        | reference        |
|                                                | AG    | 132 | 20.5% | 0.77        | 0.48-1.23        |                                                              | GT    | 92  | 25.0% | 1.15        | 0.71-1.86        |
|                                                | GG    | 26  | 26.9% | 1.09        | 0.49-2.41        |                                                              | TT    | 9   | 22.2% | 1.09        | 0.26-4.46        |
|                                                | Total | 346 |       |             | p=0.61           |                                                              | Total | 348 |       |             | p=0.60           |
|                                                | AG/GG | 158 | 21.5% | 0.82        | 0.53-1.27        |                                                              | GT/TT | 101 | 24.8% | 1.15        | 0.71-1.82        |
| <b>JAK3*</b><br>rs3008<br>3'UTR<br>Ex23+291A→G | CC    | 50  | 22.0% | 1.00        | reference        | <b>JAK3*</b><br>rs3212713<br>IVS1+42A→G                      | GG    | 98  | 22.4% | 1.00        | reference        |
|                                                | CT    | 98  | 21.4% | 0.69        | 0.31-1.47        |                                                              | AG    | 73  | 27.4% | 1.32        | 0.71-2.43        |
|                                                | TT    | 67  | 26.9% | 1.07        | 0.50-2.30        |                                                              | AA    | 25  | 16.0% | 0.70        | 0.23-2.09        |
|                                                | Total | 215 |       |             | p=0.64           |                                                              | Total | 196 |       |             | p=0.94           |
|                                                | CT/TT | 165 | 23.6% | 0.84        | 0.41-1.68        |                                                              | AG/AA | 98  | 24.5% | 1.16        | 0.64-2.09        |
| <b>LTA</b><br>rs909253<br>A252G                | AA    | 143 | 22.4% | 1.00        | reference        | <b>LTA</b><br>rs2239704<br>C-91A                             | CC    | 150 | 26.0% | 1.00        | reference        |
|                                                | AG    | 162 | 28.4% | 1.23        | 0.78-1.93        |                                                              | AC    | 135 | 28.1% | 1.11        | 0.70-1.73        |
|                                                | GG    | 58  | 29.3% | 1.36        | 0.75-2.46        |                                                              | AA    | 50  | 22.0% | 0.85        | 0.43-1.66        |
|                                                | Total | 363 |       |             | p=0.26           |                                                              | Total | 335 |       |             | p=0.84           |
|                                                | AG/GG | 220 | 28.6% | 1.26        | 0.82-1.93        |                                                              | AC/AA | 185 | 26.5% | 1.04        | 0.67-1.58        |
| <b>MBL2*</b><br>rs7095891<br>-65T→C            | CC    | 130 | 25.4% | 1.00        | reference        | <b>MBL2*</b><br>rs11595876<br>Ex4+1509A→G                    | AA    | 167 | 24.0% | 1.00        | reference        |
|                                                | CT    | 56  | 16.1% | 0.72        | 0.33-1.52        |                                                              | AG    | 28  | 21.4% | 1.06        | 0.44-2.53        |
|                                                | TT    | 11  | 36.4% | 1.33        | 0.46-3.77        |                                                              | GG    | 2   | 0.0%  | 0.00        |                  |
|                                                | Total | 197 |       |             | p=0.91           |                                                              | Total | 197 |       |             | p=0.75           |
|                                                | CT/TT | 67  | 19.4% | 0.85        | 0.44-1.61        |                                                              | AG/GG | 30  | 20.0% | 0.96        | 0.40-2.27        |
| <b>MBL2*</b><br>rs10824792<br>Ex4-1067G→A      | AA    | 75  | 24.0% | 1.00        | reference        | <b>MBL2*</b><br>rs2083771<br>Ex4-539C→A                      | AA    | 118 | 21.2% | 1.00        | reference        |
|                                                | AG    | 83  | 19.3% | 0.63        | 0.31-1.24        |                                                              | AC    | 66  | 27.3% | 1.23        | 0.66-2.27        |
|                                                | GG    | 38  | 31.6% | 1.47        | 0.70-3.06        |                                                              | CC    | 13  | 30.8% | 1.74        | 0.60-5.03        |
|                                                | Total | 196 |       |             | p=0.55           |                                                              | Total | 197 |       |             | p=0.28           |
|                                                | AG/GG | 121 | 23.1% | 0.85        | 0.46-1.54        |                                                              | AC/CC | 79  | 27.8% | 1.30        | 0.73-2.32        |

|              |       |     |       |             |                  |                   |       |     |       |             |                  |
|--------------|-------|-----|-------|-------------|------------------|-------------------|-------|-----|-------|-------------|------------------|
| <b>SELE*</b> | AA    | 176 | 22.2% | <b>1.00</b> | reference        | <b>STAT1*</b>     | CC    | 114 | 19.3% | 1.00        | reference        |
| rs5361       | AC    | 33  | 30.3% | <b>2.08</b> | <b>1.01-4.29</b> | rs2066804         | CT    | 83  | 27.7% | 1.55        | 0.85-2.80        |
| S149R        | CC    | 3   | 33.3% | <b>1.13</b> | <b>0.13-9.36</b> | IVS21-8C→T        | TT    | 13  | 23.1% | 1.27        | 0.36-4.37        |
| Ex4+24A→C    | Total | 212 |       |             | <b>p= 0.12</b>   | (splice)          | Total | 210 |       |             | p=0.25           |
|              | AC/CC | 36  | 30.6% | <b>1.95</b> | <b>0.97-3.90</b> |                   | CT/TT | 96  | 27.1% | 1.51        | 0.84-2.70        |
| <b>TLR4</b>  | AA    | 308 | 26.3% | 1.00        | reference        | <b>TNF</b>        | GG    | 241 | 23.7% | <b>1.00</b> | reference        |
| rs4986790    | AG    | 34  | 23.5% | 0.74        | 0.35-1.54        | rs1800629         | AG    | 103 | 31.1% | <b>1.41</b> | <b>0.91-2.17</b> |
| D299G        | GG    | 1   | 0.0%  | 0.00        |                  | G-308A            | AA    | 16  | 31.3% | <b>1.61</b> | <b>0.64-4.03</b> |
| Ex4+636A→G   | Total | 343 |       |             | p=0.34           | promoter          | Total | 360 |       |             | <b>p=0.088</b>   |
|              | AG/GG | 35  | 22.9% | 0.72        | 0.34-1.48        |                   | AG/AA | 119 | 31.1% | <b>1.43</b> | <b>0.94-2.17</b> |
| <b>TNF</b>   | GG    | 309 | 25.2% | 1.00        | reference        | <b>TNF</b>        | CC    | 291 | 27.8% | <b>1.00</b> | reference        |
| rs361525     | AG    | 36  | 30.6% | 1.54        | 0.81-2.92        | rs1799724         | CT    | 55  | 14.5% | <b>0.52</b> | <b>0.24-1.06</b> |
| A-417G       | AA    | 1   | 0.0%  |             |                  | -1036C→T          | TT    | 3   | 33.3% | <b>1.65</b> | <b>0.22-12.1</b> |
| aka G-238A   | Total | 346 |       |             | p=0.30           | aka C-857T        | Total | 349 |       |             | <b>p=0.15</b>    |
|              | AG/AA | 37  | 29.7% | 1.48        | 0.78-2.82        |                   | CT/TT | 58  | 15.5% | <b>0.56</b> | <b>0.28-1.11</b> |
| <b>TNF</b>   | CC    | 220 | 26.4% | 1.00        | reference        | <b>TNFRSF10A*</b> | CC    | 199 | 22.6% | 1.00        | reference        |
| rs1800630    | AC    | 86  | 26.7% | 1.04        | 0.63-1.69        | rs20577           | CT    | 0   | 0.0%  |             |                  |
| -1042A→C     | AA    | 21  | 19.0% | 0.56        | 0.20-1.54        | T33I              | TT    | 0   | 0.0%  |             |                  |
| aka C-863A   | Total | 327 |       |             | p=0.45           | Ex1+163C→T        | Total | 199 |       |             | p=0.43           |
|              | AC/AA | 107 | 25.2% | 0.92        | 0.58-1.46        |                   | CT/TT | 0   | 0.0%  |             |                  |
| <b>VCAM1</b> | TT    | 236 | 27.1% | 1.00        | reference        | <b>VCAM1</b>      | AA    | 323 | 25.1% | <b>1.00</b> | reference        |
| rs1041163    | CT    | 98  | 21.4% | 0.63        | 0.37-1.03        | rs3176879         | AG    | 22  | 36.4% | <b>2.11</b> | <b>1.00-4.43</b> |
| -1591T→C     | CC    | 6   | 33.3% | 0.83        | 0.19-3.44        | K644K             | GG    | 2   | 50.0% | <b>3.35</b> | <b>0.45-24.5</b> |
|              | Total | 340 |       |             | p= 0.10          | Ex9+149G→A        | Total | 347 |       |             | <b>p=0.023</b>   |
|              | CT/CC | 104 | 22.1% | 0.64        | 0.39-1.04        |                   | AG/GG | 24  | 37.5% | <b>2.20</b> | <b>1.08-4.45</b> |

<sup>†</sup>HR adjusted for age, clinical and demographic factors.

<sup>‡</sup>N=365 for the 52 SNPs genotyped in blood or buccal samples, and N=215 for the 21 SNPs genotyped only in blood samples (blood-only SNPs are \*); totals less than these numbers are due to missing genotype (no call).
