# Supplementary material
Source: PubMed Central journal article supplement (PMC2556607)
Supplement: blood-2007-09-111658_2.pdf [file blood-2007-09-111658_2.pdf]

| Gene                | SNPs in Haplotype |            |            |            |            | Haplotype %    | HR*       | 95% CI       | P            |     |
|---------------------|-------------------|------------|------------|------------|------------|----------------|-----------|--------------|--------------|-----|
| <b>LTA/<br/>TNF</b> | rs2239704         | rs909253   | rs1799724  | rs1800629  | rs361525   |                |           |              |              |     |
|                     | <i>LTA</i>        | <i>LTA</i> | <i>TNF</i> | <i>TNF</i> | <i>TNF</i> |                |           |              |              |     |
|                     | C-91A             | A252G      | C-1036T    | G-308A     | G-238A     |                |           |              |              |     |
|                     | 1                 | A          | A          | C          | G          | G              | 27%       | 1.00         | reference    |     |
|                     | 2                 | A          | A          | T          | G          | G              | 8%        | 0.74         | (0.36, 1.52) | 0.4 |
|                     | 3                 | C          | A          | C          | G          | A              | 5%        | 1.38         | (0.71, 2.70) | 0.4 |
|                     | 4                 | C          | A          | C          | G          | G              | 22%       | 0.83         | (0.54, 1.28) | 0.4 |
|                     | 5                 | A          | G          | C          | A          | G              | <1%       |              |              |     |
|                     | 6                 | A          | G          | C          | G          | G              | <1%       |              |              |     |
|                     | 7                 | A          | G          | T          | G          | G              | <1%       |              |              |     |
| 8                   | C                 | G          | C          | A          | G          | 18%            | 1.27      | (0.83, 1.95) | 0.3          |     |
| 9                   | C                 | G          | C          | G          | G          | 20%            | 0.96      | (0.63, 1.48) | 0.9          |     |
|                     |                   |            |            |            |            | global $p=0.4$ |           |              |              |     |
| <b>IL8</b>          | rs4073            | rs2227307  | rs2227306  |            |            |                |           |              |              |     |
|                     | IL8 T/A           | IL8 T/G    | IL8 C/T    |            |            |                |           |              |              |     |
|                     | 1                 | A          | G          | C          |            | 5%             | 1.25      | (0.69, 2.27) | 0.5          |     |
|                     | 2                 | A          | G          | T          |            | 41%            | 0.96      | (0.69, 1.33) | 0.8          |     |
|                     | 3                 | A          | T          | C          |            | 3%             |           |              |              |     |
| 4                   | T                 | T          | C          |            | 51%        | 1.00           | reference |              |              |     |
|                     |                   |            |            |            |            | global $p=0.7$ |           |              |              |     |
| <b>IL8RB</b>        | rs1126579         | rs2230054  | rs1126580  |            |            |                |           |              |              |     |
|                     | IL8RB C/T         | IL8RB T/C  | IL8RB A/G  |            |            |                |           |              |              |     |
|                     | 1                 | C          | C          | A          |            | 4%             |           |              |              |     |
|                     | 2                 | C          | C          | G          |            | 1%             |           |              |              |     |
|                     | 3                 | C          | T          | A          |            | 37%            | 1.00      | reference    |              |     |
|                     | 4                 | C          | T          | G          |            | 13%            | 1.46      | (0.67, 3.16) | 0.3          |     |
|                     | 5                 | T          | C          | A          |            | 21%            | 0.69      | (0.35, 1.36) | 0.3          |     |
|                     | 6                 | T          | C          | G          |            | 21%            | 1.33      | (0.77, 2.31) | 0.3          |     |
|                     | 7                 | T          | T          | A          |            | <1%            |           |              |              |     |
| 8                   | T                 | T          | G          |            | <1%        |                |           |              |              |     |
|                     |                   |            |            |            |            | global $p=0.2$ |           |              |              |     |

\*Hazard ratio, adjusted for age, clinical and demographic factors.
